# Supplementary material for: Remission in Crohn’s disease is accompanied by alterations in the gut microbiota and mucins production
Source: PubMed Central journal article supplement (PMC6744406; doi:10.1038/s41598-019-49893-5), 2019-09-13
Supplement: 41598_2019_49893_MOESM1_ESM.pdf [file 41598_2019_49893_MOESM1_ESM.pdf]

**Remission in Crohn's disease is accompanied by alterations in the gut microbiota and mucins production.**

**Daniéla Oliveira Magro<sup>2</sup> PhD<sup>#</sup>**

**danimagro@terra.com.br**

**Andrey Santos<sup>1</sup> PhD<sup>\*#</sup>**

**andreysts@gmail.com**

**Dioze Guadagnini<sup>1</sup> MD**

**diozeg@gmail.com**

**Flavia Moreira de Godoy<sup>3</sup>**

**flagodoy94@gmail.com**

**Sylvia Helena Monteiro Silva<sup>1</sup>**

**sylmonteiro3@gmail.com**

**Wilson José Fernandes Lemos<sup>4</sup>**

**juniorjflemos@gmail.com**

**Nicola Vitulo<sup>4</sup>**

**nicola.vitulo@univr.it**

**Sandra Torriani<sup>4</sup>**

**sandra.torriani@univr.it**

**Lilian Vital Pinheiro<sup>2</sup> MD**

**lilian\_vp@yahoo.com.br**

**Carlos Augusto Real Martinez<sup>2</sup>; PhD**

**carmartinez@uol.com.br**

**Mario José Abdalla Saad<sup>1</sup> MD; PhD**

**msaad@fcm.unicamp.br**

**Claudio Saddy Rodrigues Coy<sup>2</sup>, MD, PhD**

**claudiocoy@gmail.com**

**Table 1S.** PERMANOVA on CD and CG dataset: Permutation test for Adonis under reduced model, Permutation: free, Number of permutations: 10000,

|          | Df | SumOfSqs | R2      | F      | Pr(>F)  |
|----------|----|----------|---------|--------|---------|
| Origin   | 1  | 0.2602   | 0.04627 | 1.6439 | 0.023 * |
| COLONO*  | 5  | 0.7737   | 0.13756 | 0.9775 | 0.4996  |
| Residual | 29 | 4.5906   | 0.81618 |        |         |
| Total    | 35 | 5.6245   | 1       |        |         |

Significance codes: 0 '\*\*\*' 0.001 '\*\*' 0.01 '\*' 0.05 '.' 0.1 ' ' 1.

\*Disease activity in CD patients was assessed by the CDAI score and endoscopic findings

## Contribution on comp 1

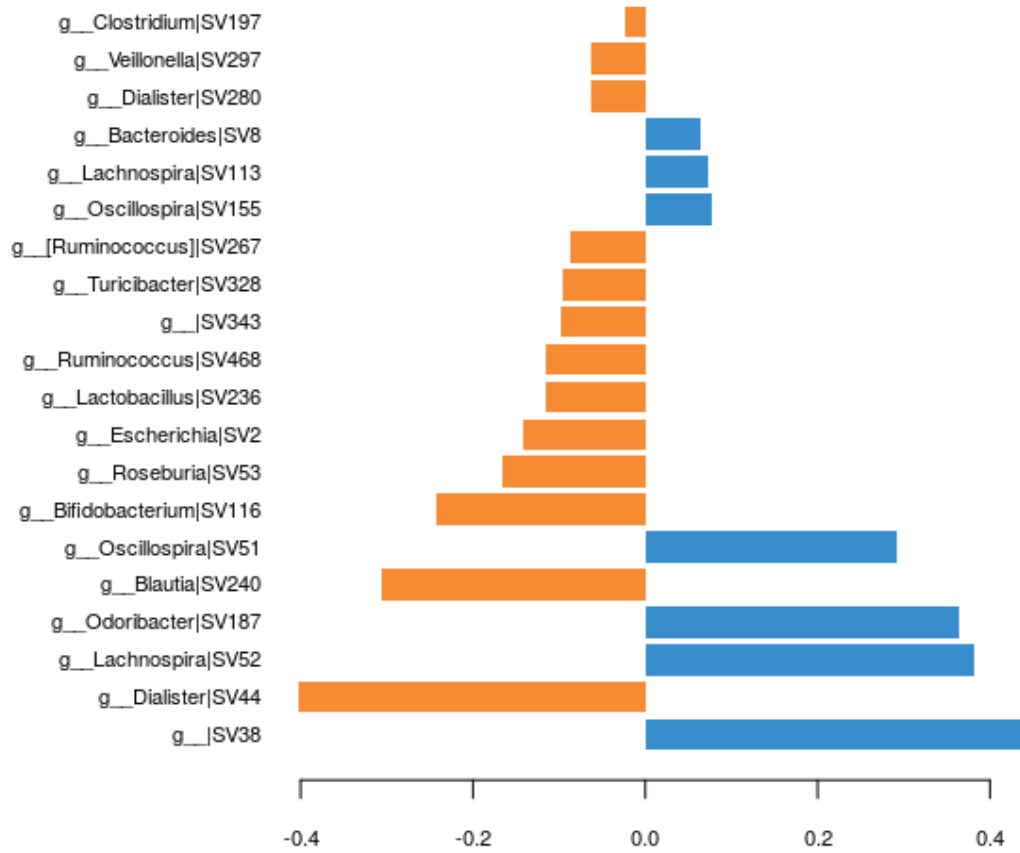

**Figure 1S Genera differentiating between the CG and CD.** Contribution of each genus identified by sPLS-DA, samples origin: CG (blue) or CD (orange).
